# Supplementary material
Source: HighWire-hosted journal article supplement (https://jnm.snmjournals.org/highwire/filestream/110107/field_highwire_adjunct_files/0/264361_Supplemental_Data.pdf)
Supplement: 264361_Supplemental_Data.pdf [file 264361_Supplemental_Data.pdf]

## Supplemental figure 1

**A**

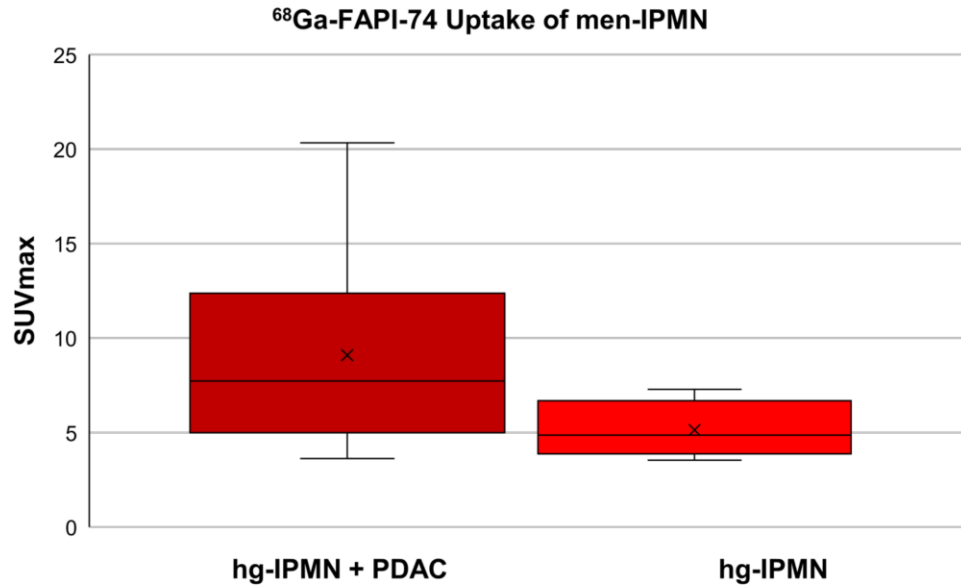

**B**

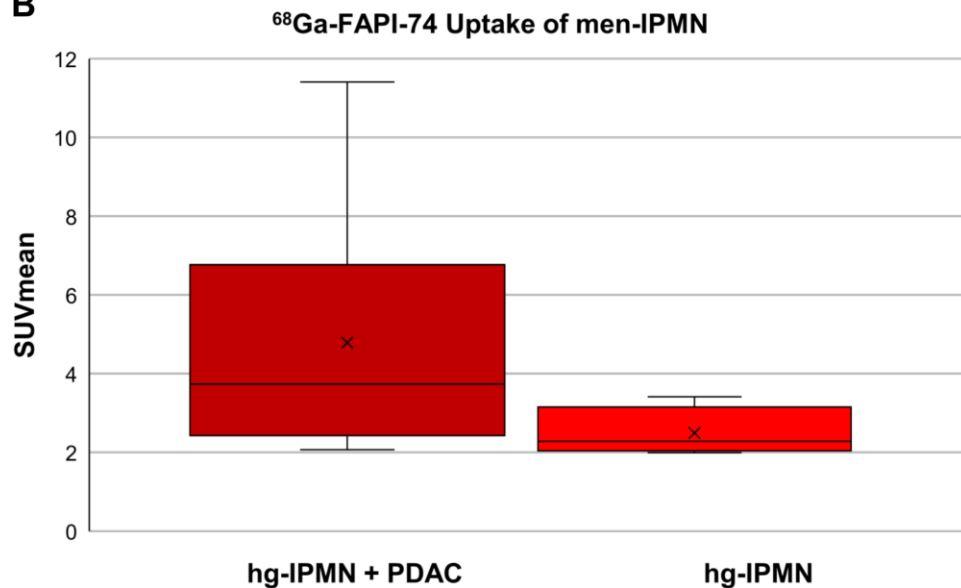

**A,B** Boxplots of SUVmax (A) and SUVmean (B) values of high grade IPMN with and without PDAC. Boxes represent the interquartile range, whiskers the range of 1.5 IQR, horizontal line within the box indicates the median and cross the mean. Data outliers are shown separately within graph.

## Supplemental figure 2

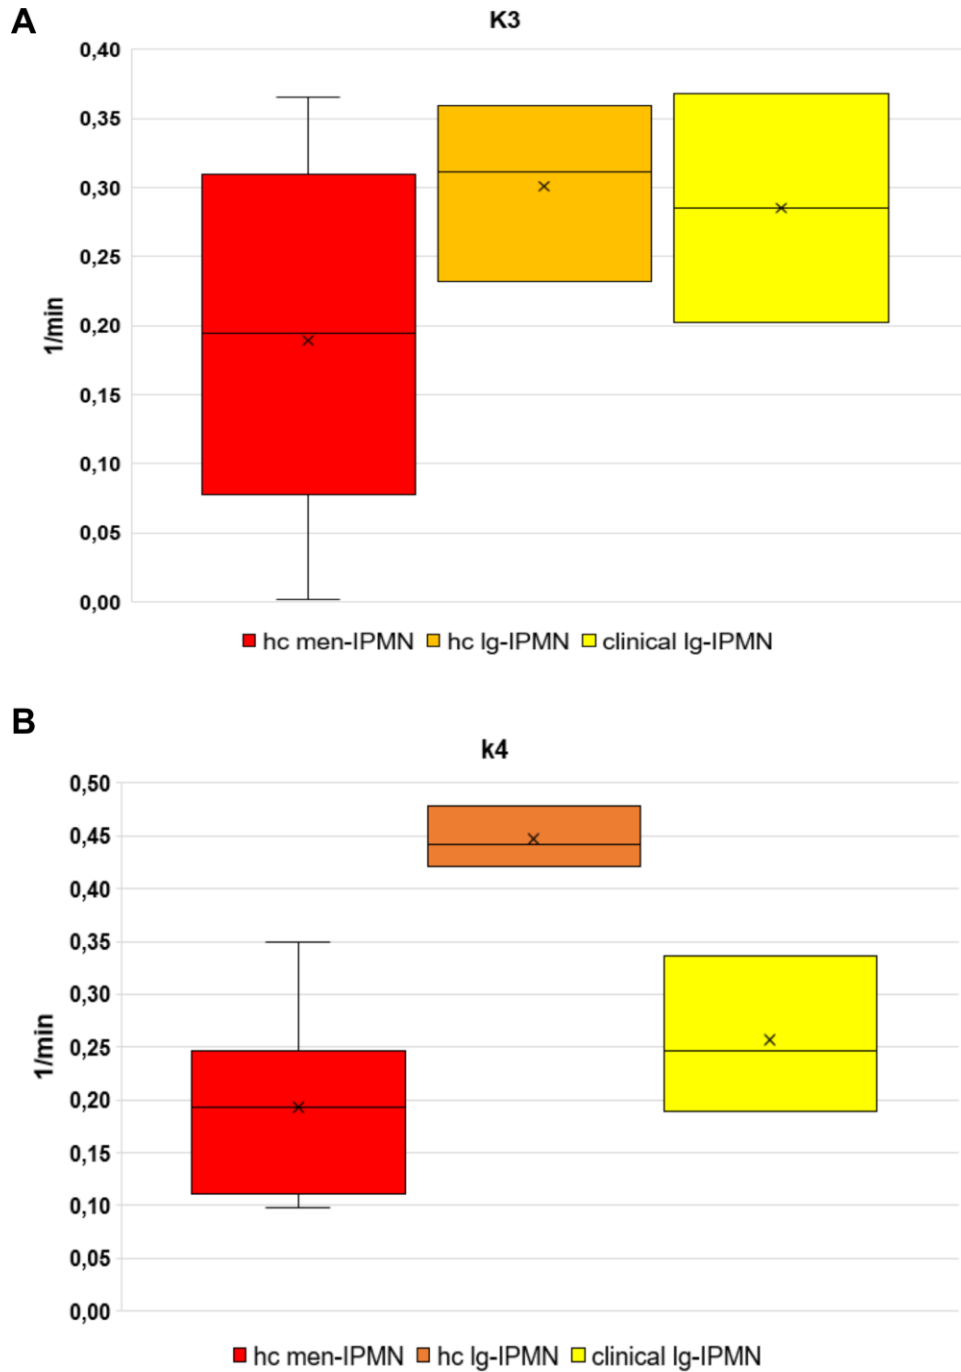

**A,B** Box plots displaying K3 (A) and k4 (B) values of histologically confirmed menacing IPMN, histologically confirmed low grade IPMN and clinically low grade IPMN as calculated by kinetic modeling of dynamic  $^{68}\text{Ga}$ -FAPI-74 PET imaging data. Boxes represent the interquartile range, whiskers the range of 1.5 IQR, horizontal line within the box indicates the median and cross the mean. Data outliers are shown separately within graph.
